# Supplementary material for: Analysis of Global Collection of Group A Streptococcus Genomes Reveals that the Majority Encode a Trio of M and M-Like Proteins
Source: PubMed Central journal article supplement (PMC6952200; doi:10.1128/msphere.00806-19), 2020-01-08

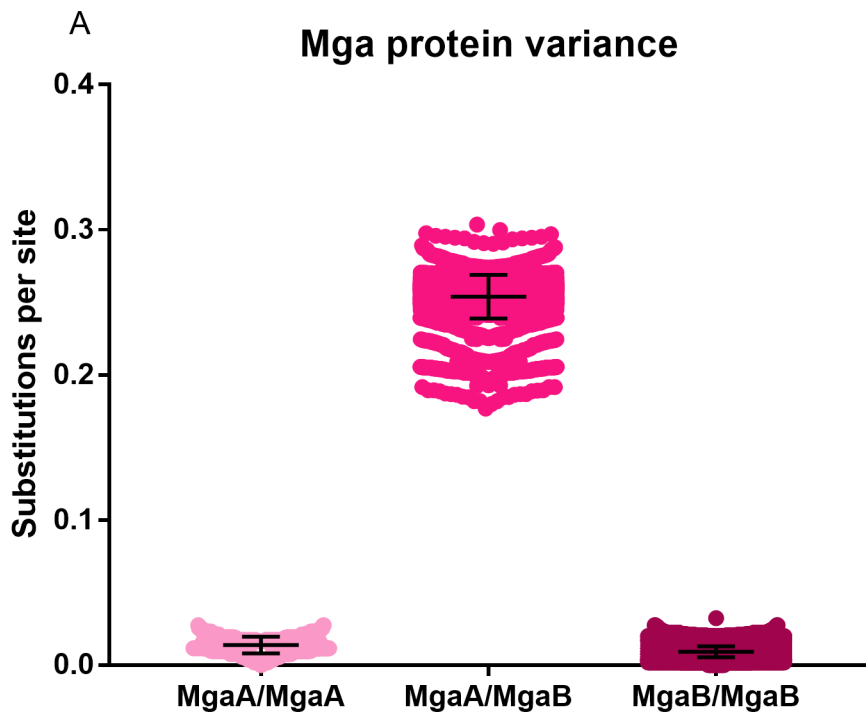

**B**

**Mga protein**

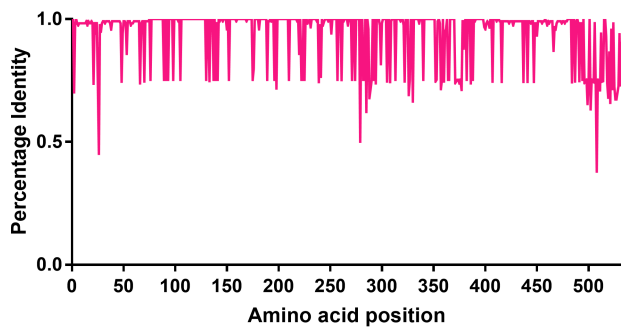

**Mrp protein**

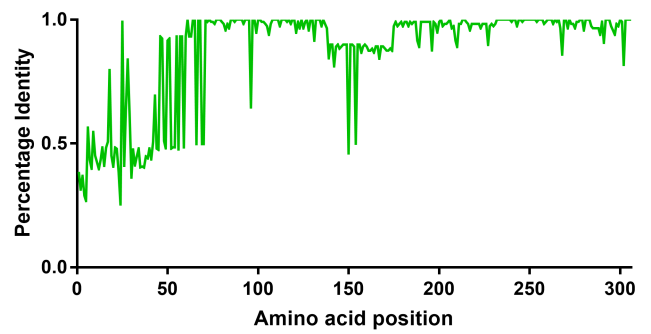

**M protein**

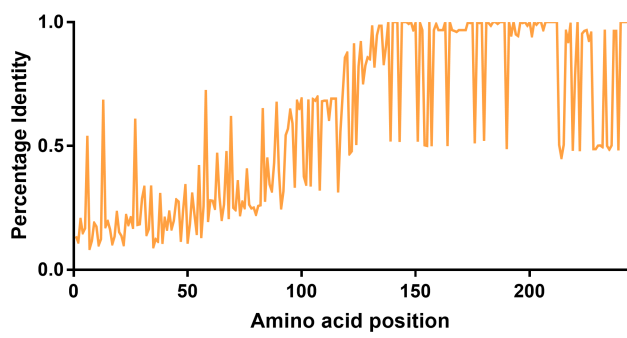

**Enn Protein**

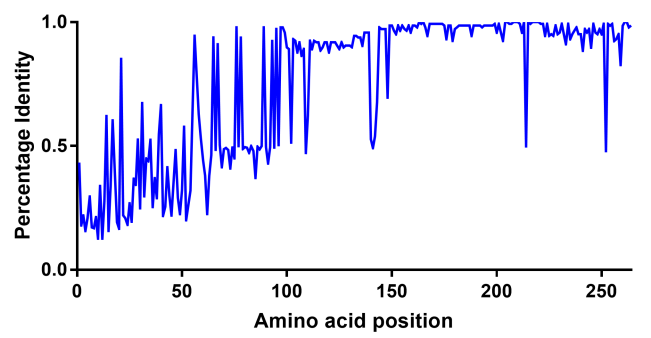

**C5a peptidase**

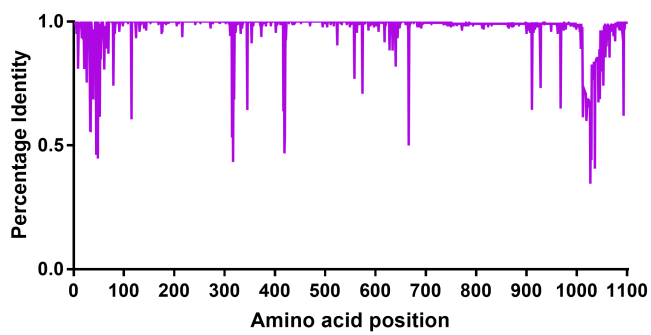

**Protein H**

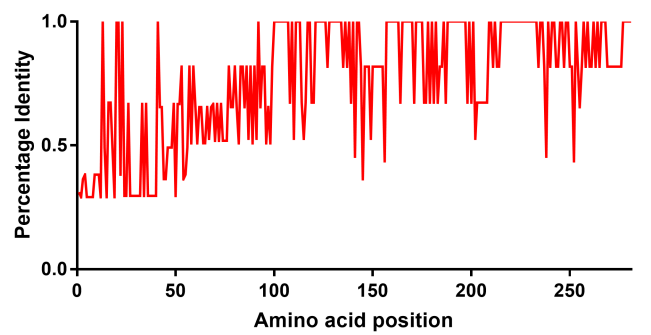

**Sic Protein**

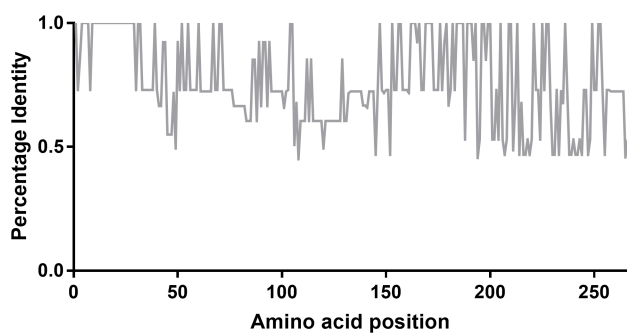

**Pgs Protein**

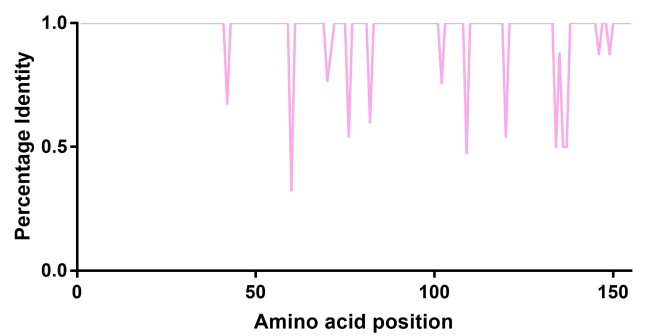

Supplement: mSphere.00806-19-sf002.pdf [file mSphere.00806-19-sf002.pdf]
